# Supplementary material for: Vaccination with Helicobacter pylori attachment proteins protects against gastric cancer
Source: PubMed Central journal article supplement — bioRxiv. 2023 Jul 4:2023.05.25.542131. Preprint. [Version 2] doi: 10.1101/2023.05.25.542131 (PMC10349987; doi:10.1101/2023.05.25.542131), 2023-07-04
Supplement: NIHPP2023.05.25.542131V2-supplement-1.pdf [file NIHPP2023.05.25.542131V2-supplement-1.pdf]

# 1 Supplemental figures

2

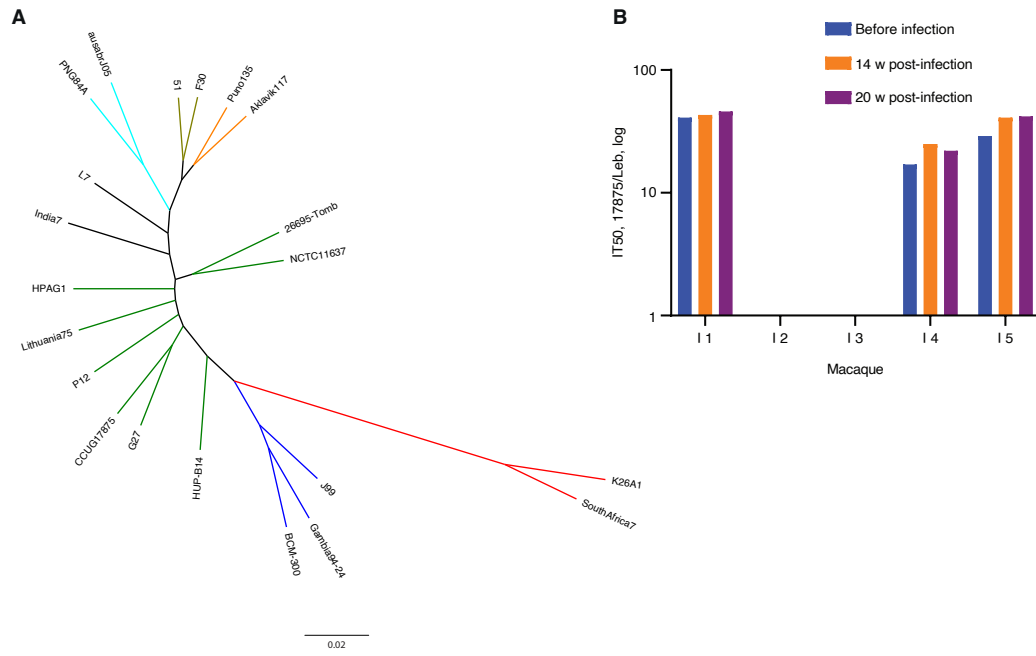

1 **Figure S1. The BCM300 strain phylogeny and induction of IT50 responses by**  
2 **challenge infection in rhesus macaques.**

3 **(A)** Maximum likelihood (PhyML) phylogeny relating CCUG 17875 (17875/Leb, GenBank  
4 CP090367) and BCM-300 (GenBank assembly GCA\_900149805.1) to a reference set of  
5 worldwide *H. pylori* genomes. Branch colors denote the *H. pylori* phylogeographic  
6 populations hpAfrica2 (Africa, red), hpAfrica1 (Africa blue, including strains BCM-300 and  
7 reference strain J99), hpEurope (Europe, green, including reference strains CCUG17875  
8 and 26695-Tomb), hpAsia2 (India, black), hpSahul (Australia and Papua New Guinea,  
9 turquoise), hspEAsia (South Korea and Japan, olive), and hspIndigenousAmerica (Peru  
10 and Canada, orange).

11 **(B)** Five SPF rhesus macaques were challenge infected with *H. pylori* J166 to test for the  
12 induction of IT50 responses. However, three of the animals, no. 1, 4, and 5, demonstrated  
13 pre-challenge IT50 titers (in blue) as tested with 17875, suggesting that they carried *H.*  
14 *pylori* before the start of the test.  
15

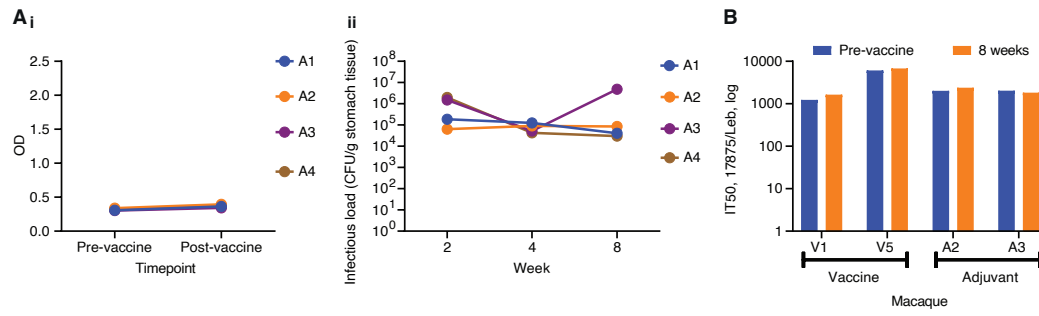

1 **Figure S2. Vaccination and IT50 responses in rhesus macaques.**

2 **(A $\bar{i}$ )** ELISA detection of serum BabA antibodies from adjuvant-only control animals, where  
3 all four animals were BabA ELISA-negative. **(A $\bar{i}$ )** The four adjuvant-only control animals  
4 demonstrated stable high infection loads during the 8 weeks of infection.

5 **(B)** The vaccinated animals V1 and V5 and the adjuvant-only control animals A2 and A3  
6 demonstrated high pre-challenge IT50 titers when tested with strain 17875.

7

1

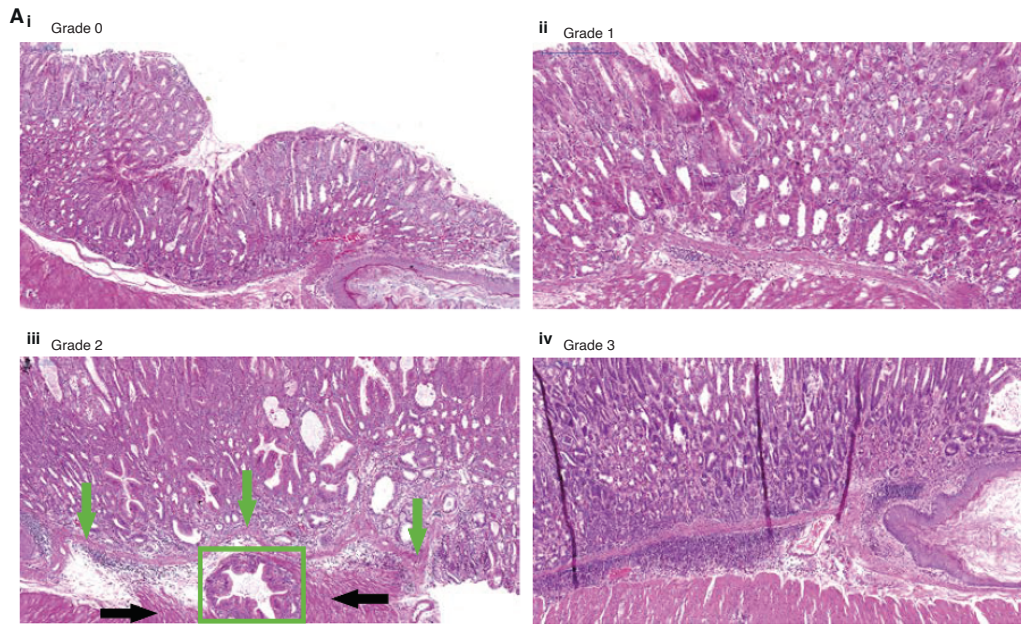

2

1 **Figure S3. The Leb-mouse gastric cancer animal model. The gastric mucosal**  
2 **inflammatory infiltration scores**

3 **(Ai)**: Grade 0: The mucous membrane and submucous plate contain rare inflammatory  
4 cells, which are diffused throughout the tissue. Inflammatory cells do not form piles  
5 (infiltrations) or groups. There are fewer than 20 inflammatory cells (neutrophils,  
6 lymphocytes, macrophages, and plasmocytes) visible in the field of view (FOV) (diameter:  
7 1000  $\mu\text{m}$ ).

8 **(Aii)**: Grade 1: The inflammatory cells are located in the basal part of the mucous  
9 membrane and submucous plate where they can form small groups or piles. There are  
10 20–100 inflammatory cells (neutrophils, lymphocytes, macrophages, and plasmocytes)  
11 visible in the FOV.

12 **(Aiii)**: Grade 2: Inflammatory cells are seen in all parts of the mucous membrane and  
13 submucous plate. Inflammatory infiltrates (like small lymph nodules) are seen in the basal  
14 part of the mucous membrane and submucous plate. The gastric tissue contains 100–  
15 300 inflammatory cells per FOV. In addition, the tissue exhibits fulminant gastric  
16 adenocarcinoma with growth and penetration through the submucosal layer (lamina  
17 propria indicated by green arrows) and with the invasion of cancer tissue (green box) into  
18 the muscular layer (indicated by the black arrows).

19 **(Aiv)**: Grade 3: The inflammatory infiltrates are present in all layers of the gastric tissue  
20 and form large inflammatory infiltrates (similar to lymphatic nodes) in the submucous plate  
21 (between the muscular and mucus layers). The gastric tissue contains more than 300  
22 inflammatory cells in the FOV.

23

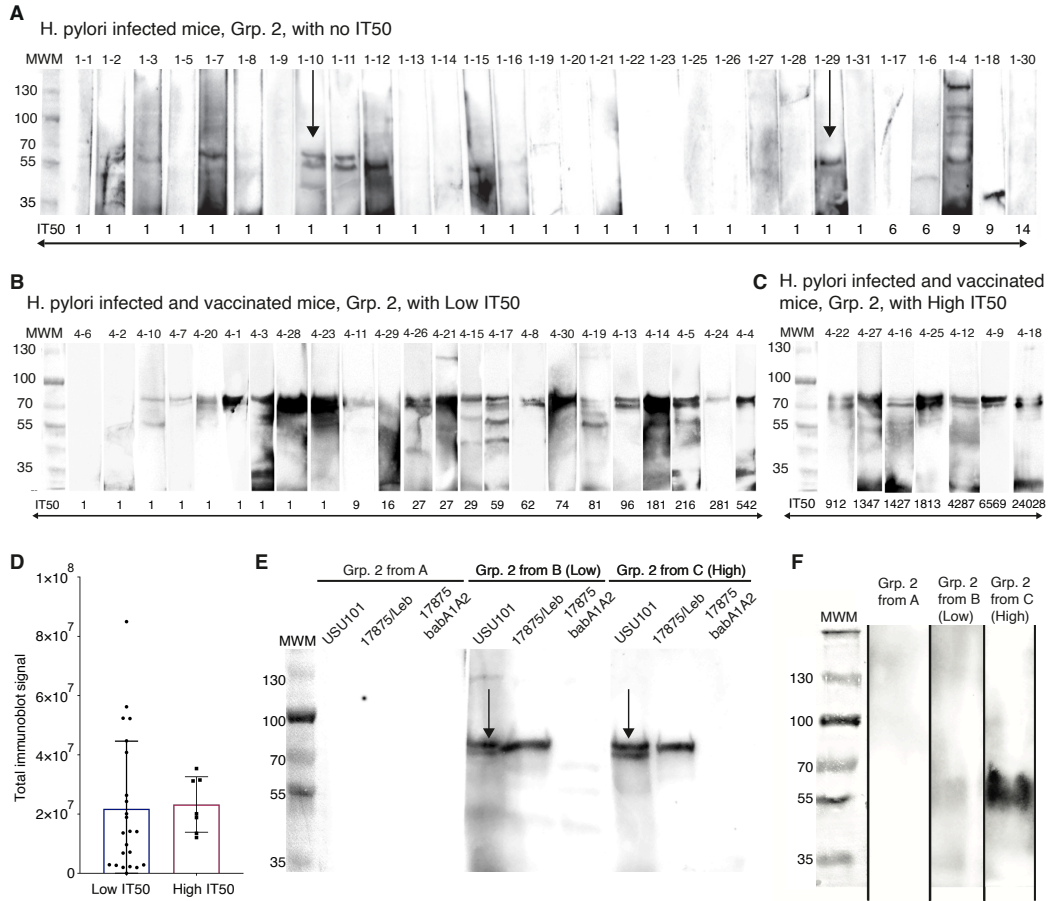



1 **Figure S4. The first vaccination experiment induced protection against**  
2 **inflammation and cancer.**

3 The sera samples from the 30 non-vaccinated mice and the 30 vaccinated mice were  
4 analyzed by immunoblot detection of whole bacterial protein extracts from *H. pylori* strain  
5 USU101, i.e., the strain used for the 12-month infections. The *H. pylori* protein extract  
6 was separated on an SDS gel under denaturing (in **A**, **B**, **C**, and **E**) or semi-native (**F**)  
7 conditions. After immunoblot transfer, the membranes were cut into strips. The  
8 immunoblot signals were detected with mouse sera diluted 1:250 and goat-anti-mouse  
9 HRP-Ab. The strips in **A**, **B**, and **C** were arranged according to IT50s. Under reducing  
10 conditions, the 78 kDa BabA protein band migrated with a molecular mass of ~75 kDa;  
11 (**A**) with no immuno-detected bands present and in (**B**) and (**C**) where both the BabA and  
12 the BabB (migrating slightly faster) bands are present (also in (**E**)).

13 (**A**) The 30 infected but not vaccinated mice all lacked BabA/BabB immunoblot signals,  
14 with a median IT50 of  $9 \pm 5$  (similar to the non-infected mice with a median IT50 of  $6 \pm 5$ )  
15 (**Table 3B** and **3C**). The blot was cut into strips and arranged according to IT50s.

16 (**B**) The 23 infected and vaccinated mice that displayed LOW IT50s with median IT50 =  
17 27 and mean IT50 = 74 (**Table S4A**). The blot was cut into strips and arranged according  
18 to IT50s.

19 (**C**) The seven infected and immunized mice that displayed HIGH IT50s, with median IT50  
20 = 1813 and mean IT50 = 5769 (**Table S4A**). The blot was cut into strips and arranged  
21 according to IT50s.

22 (**D**) Scanning of the immunoblot chemiluminescence signal from all immunoblot strips  
23 from immunized mice, i.e., from (**B**) with LOW IT50 and from (**C**) with HIGH IT50, showed  
24 that the two groups demonstrated no significant difference in intensity in immune  
25 response signals against the BabA and BabB bands. Thus, the vaccinated HIGH IT50  
26 mice did not show a stronger signal for linear BabA and BabB epitopes compared to the  
27 LOW IT50 mice suggesting that the HIGH IT50 group of mice were not hyper-responding  
28 *per se* but rather displayed additional and different immune responses.

29 (**E**) Seven sera samples were pooled from A, from B (Low IT50) and from C (High  
30 IT50) and used to probe three immunoblots with whole bacterial protein extracts from  
31 strain *H. pylori* USU101 (SabA<sup>-</sup>, BabA<sup>+</sup>, BabB<sup>+</sup>), 17875/Leb (SabA<sup>-</sup>, BabA<sup>+</sup>, BabB<sup>-</sup>), and  
32 17875bab1babA2 (SabA<sup>+</sup>, BabA<sup>-</sup>, BabB<sup>-</sup>). The *H. pylori* protein extracts were separated  
33 on SDS gels under denaturing and reducing conditions. Sera from the infected but non-  
34 immunized animals did not display the ~70–75 kDa BabA/BabB-bands (from **A**), but the  
35 bands were visible in sera from immunized animals (from **B** and from **C**) and separated  
36 protein extracts from *H. pylori* strains USU101 and 17875/Leb. Two bands were seen on  
37 the immunoblot of strain USU101 that expresses both BabA and BabB. In comparison,  
38 only the upper ~75 kDa band was seen for 17875/Leb that expresses BabA but not BabB.  
39 In support of this, the ~70–75 kDa bands were not seen on immunoblot of sera from  
40 immunized animals using protein extracts from the *babA*-deletion mutant  
41 17875bab1babA2 that does not express BabA or BabB. In contrast, the SabA band was  
42 not detected in the 17875bab1babA2 strain, which suggests that SabA is less  
43 immunogenic. These results showed that vaccination with BabA and BabB protein raised  
44 a humoral immune response against BabA and BabB in almost every vaccinated mouse  
45 i.e., the animals in (**B**) and (**C**) with LOW vs. HIGH IT50s. In contrast, the infected but not  
46 vaccinated animals (**A**) did not demonstrate natural immune responses towards

1 BabA/BabB. Blots with several dilution series were cut out and aligned for presentation.  
2 (F) Seven sera samples were pooled from A, from B (Low IT50) and from C (High IT50)  
3 and were used to probe three immunoblots with purified BabA protein from strain  
4 17875/Leb. Different from (E), in this test the BabA protein was separated by SDS gel  
5 electrophoresis under semi-native and non-reducing conditions, similar to **Figures 1I** and  
6 **S1H** in *Bugaytsova et al., ms 1*. The BabA protein was detected only using sera from  
7 mice in (C), i.e., vaccinated mice with High IT50 responses, whereas mice from groups **A**  
8 and **B**, i.e., the infected vs. the infected and vaccinated mice with Low IT50s, provided no  
9 immuno-signal with semi-native BabA protein. For this test, the sera samples were 2-fold  
10 more dilute (1:500) in order to minimize the (weaker) immune detection of linear epitopes  
11 and to preferentially display the (stronger) immune signal of bbAbs that bind to structural  
12 and folded BabA epitopes. Thus, the antibodies that were common for both the  
13 vaccinated mice with Low (**B**) or High (**C**) IT50s recognize and bind linear BabA epitopes  
14 on denaturing immunoblots. In contrast, the bbAbs that were only found in the sera of  
15 mice with High IT50 (**C**) can bind to structural BabA epitopes under semi-native  
16 conditions. Strips were cut out and aligned because the denatured vs. semi-native  
17 samples needed to be separated.  
18

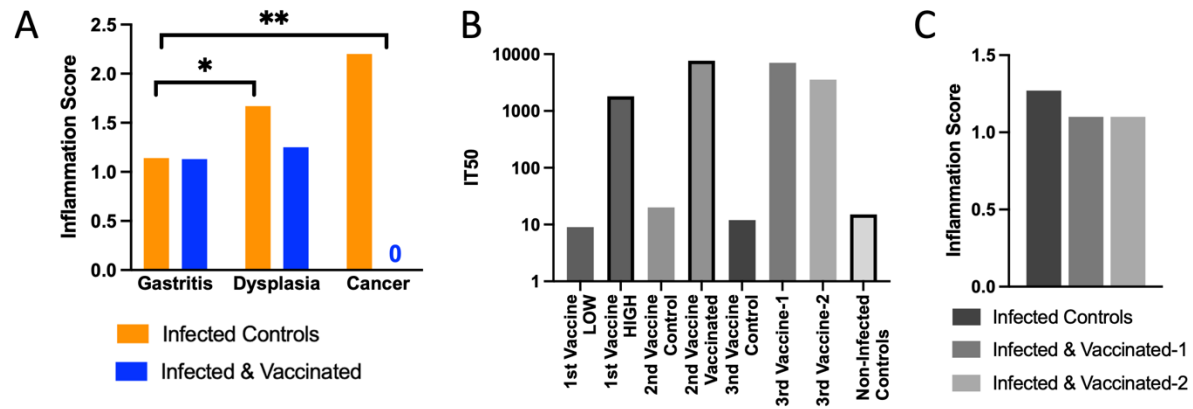

1  
2

1 **Figure S5. Both the second and third vaccination experiments induced protection**  
2 **against inflammation and cancer.**

3 **(A)** Similar to the first vaccination experiment, also in the second experimental series the  
4 non-vaccinated mice had higher inflammation scores compared to the vaccinated mice.  
5 The non-vaccinated mice with dysplasia scored 1.67, Dunn's test  $p = 0.039^*$ , and those  
6 with cancer scored 2.2,  $p < 0.001^{**}$ , compared to the mice with gastritis that scored 1.1.

7 **(B)** The distribution of median IT50s for the first, second, and third vaccine experiments.  
8 In the first vaccination experiment, the LOW IT50 group demonstrated a median  
9 background IT50 = 16, which was in contrast to the several log-fold higher IT50s, median  
10 IT50 = 1813, in the HIGH IT50 group (**Figure 4**). In the second vaccination experiment  
11 (**Figures 5 A-C**), the 16 non-vaccinated control mice demonstrated similar low IT50 = 20,  
12 in contrast to the several log-fold higher IT50s, median IT50 = 7318, in the 21 vaccinated  
13 mice. Also, in the third vaccination experiment (**Figure 5D**) the 30 non-vaccinated control  
14 mice demonstrated similar low IT50, median IT50 = 15, in contrast to the several log-fold  
15 higher IT50s, median IT50 = 7026, in the 27 vaccinated mice in the Vaccine-1 group and  
16 the several log-fold higher IT50s, median IT50 = 3557, in the 28 vaccinated mice in the  
17 Vaccine-2 group. The 4 non-infected mice demonstrated no or low IT50, with a median  
18 IT50 = 15.

19 **(C)** The lower gastric cancer incidence in the third vaccine experiment might be a  
20 consequence of the lower mucosal inflammation score of 1.25 in the non-vaccinated  
21 animals and 1.1 in the vaccinated animals (Vaccine-1 and Vaccine-2) compared to the  
22 higher inflammation score of 1.5 in the non-vaccinated mice in the second vaccine  
23 experiment.  
24

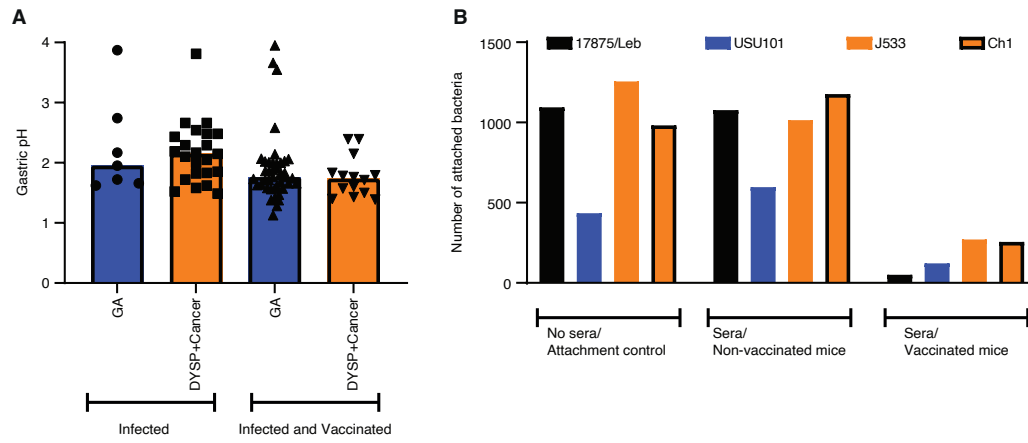

1 **Figure S6. Vaccination preserved gastric acidity and induced bbAb responses that**  
2 **reduced *H. pylori* gastric mucosal attachment.**

3 **(A).** In the third vaccination series, the non-vaccinated mice demonstrated elevated  
4 gastric pH, whereas the vaccinated groups preserved the gastric acidity over the 12-  
5 month period,  $p = 0.00073^{***}$ .

6 **(B)** Sera from the second vaccinated group of mice reduced attachment to the human  
7 gastric mucosa of *H. pylori* 17875/Leb, USU101, J533 (Japan), and Ch1 (China)  
8 compared to the sera of the non-vaccinated controls.  
9

# 1 Supplemental Tables

2

3 Table S1 related to Figure 1.

4

5 Table S2. related to Figure 2.

6

7 Table S3. related to Figure 3.

8

9 Table S4. related to Figures 4 and 5

10

11 Table S5. related to Figures 5 and 6.

12

13

1 **Table S1**

2

3 **Table S1A related to Fig. 1A.**

4

**The sera IT50s of healthy volunteers from placebo-controlled phase 1/2 study.**

| Serum Code | IT50, <i>H. pylori</i> BCM300 |               | IT50, <i>H. pylori</i> 17875/Leb |                 |
|------------|-------------------------------|---------------|----------------------------------|-----------------|
|            | Pre-infected                  | Post-12 weeks | Pre-infected                     | Post-12 weeks   |
| 1001       | 1                             | 297           | 1                                | 1               |
| 1002       | 1                             | 139           | 1                                | 1               |
| 1003       | 1                             | 267           | 1                                | 1               |
| 1004       | 1                             | 1823          | 1                                | 1               |
| 1006       | 1                             | 111           | 1                                | 1               |
| 1007       | 1                             | 437           | 1                                | 30 <sup>a</sup> |
| 1008       | 1                             | 54            | 1                                | 1               |
| 1010       | 1                             | 246           | 1                                | 1               |
| 1016       | 1                             | 181           | 1                                | 1               |
| 1018       | 18                            | 368           | 1                                | 85 <sup>a</sup> |
| 1019       | 1                             | 1039          | 1                                | 1               |
| 1021       | 1                             | 285           | 1                                | 1               |
| 1022       | 1                             | 880           | 1                                | 1               |
| 1023       | 1                             | 370           | 1                                | 1               |
| 1024       | 1                             | 1492          | 1                                | 51 <sup>a</sup> |
| 1027       | 1                             | 1             | 1                                | 1               |
| 1028       | 1                             | 3467          | 1                                | 1               |
| 1029       | 1                             | 54            | 1                                | 16              |
| 1030       | 1                             | 2772          | 1                                | 27 <sup>a</sup> |
| 1031       | 1                             | 212           | 1                                | 1               |



|      |      |     |   |                 |
|------|------|-----|---|-----------------|
| 1034 | 1    | 70  | 1 | 1               |
| 1038 | 1    | 128 | 1 | 1               |
| 1039 | 25   | 68  | 1 | 1               |
| 1040 | 1    | 62  | 1 | 1               |
| 1042 | 1    | 58  | 1 | 1               |
| 1047 | 1    | 23  | 1 | 1               |
| 1048 | 1    | 134 | 1 | 50 <sup>a</sup> |
| 1049 | 30   | 41  | 1 | 1               |
| 1053 | 1025 | 438 | 1 | 6               |

<sup>a</sup> - Immune response above the critical IT50>30 is indicated by colored boxes.

Table S1B related to Fig. 1Bi.

The sera IT50s of SPF macaques challenge infected with *H. pylori* J166 and tested with J166 and 17875/Leb.

| Macaque | IT50 <i>H. pylori</i> , J166 (Fig. 1Bi) |                     |                     | IT50 <i>H. pylori</i> , 17875/Leb (fig. S1A) |                     |                     |
|---------|-----------------------------------------|---------------------|---------------------|----------------------------------------------|---------------------|---------------------|
|         | Before infection                        | 14 w post-infection | 20 w post-infection | Before infection                             | 14 w post-infection | 20 w post-infection |
| I 1     | 13546                                   | 12424               | 11629               | 41                                           | 43                  | 46                  |
| I 2     | 12                                      | 195                 | 228                 | 1                                            | 1                   | 1                   |
| I 3     | 52                                      | 167                 | 174                 | 1                                            | 1                   | 1                   |
| I 4     | 9346                                    | 12789               | 11191               | 17                                           | 25                  | 22                  |
| I 5     | 7364                                    | 13945               | 9452                | 29                                           | 41                  | 42                  |

Table S1C related to Fig. 1Bii.

The sera IT50s of SPF macaques challenge infected with *H. pylori* J166 and tested with J166 and I9.

| Macaque | IT50 <i>H. pylori</i> , J166 |                     | IT50 <i>H. pylori</i> , I9 |                     |
|---------|------------------------------|---------------------|----------------------------|---------------------|
|         | Before infection             | 20 w post-infection | Before infection           | 20 w post-infection |
| I 2     | 20                           | 231                 | 16                         | 45                  |
| I 3     | 65                           | 223                 | 32                         | 50                  |

1 **Table S2 related to Fig. 2.**

2

3 **Table S2A related to Fig. 2Ai and fig. S2 Ai.**

4 **The sera ELISA of vaccinated and control macaques.**

| Time-point  | ELISA           |       |       |       |       |                 |       |       |       |
|-------------|-----------------|-------|-------|-------|-------|-----------------|-------|-------|-------|
|             | V1 <sup>a</sup> | V2    | V3    | V4    | V5    | A1 <sup>b</sup> | A2    | A3    | A4    |
| Pre-vaccine | 0.336           | 0.351 | 0.361 | 0.366 | 0.282 | 0.307           | 0.339 | 0.303 | 0.318 |
| Postvaccine | 0.501           | 1.950 | 2.371 | 0.950 | 1.382 | 0.363           | 0.395 | 0.343 | 0.375 |

5 V<sup>a</sup> – vaccinated macaque

6 A<sup>b</sup> – control macaque with adjuvant only

7

8 **Table S2B related to Fig. 2Aii and Fig. S2Aii.**

9 ***H. pylori* infectious load in vaccinated and control macaques.**

| Time after vaccination | Infectious load (CFU/g of stomach tissue) |     |       |            |           |                 |        |           |           |  |
|------------------------|-------------------------------------------|-----|-------|------------|-----------|-----------------|--------|-----------|-----------|--|
|                        | V1 <sup>a</sup>                           | V2  | V3    | V4         | V5        | A1 <sup>b</sup> | A2     | A3        | A4        |  |
| Week 2                 | 95.500                                    | 140 | 665   | 2.750.000  | 132.000   | 187.000         | 63.900 | 1.500.000 | 1.970.000 |  |
| Week 4                 | 36.100                                    | 1   | 1     | 2.880.000  | 383.000   | 125.000         | 90.900 | 52.400    | 42.900    |  |
| Week 8                 | 154.000                                   | 205 | 6.290 | 40.600.000 | 2.410.000 | 40.500          | 85.300 | 4.860.000 | 29.900    |  |

10 V<sup>a</sup> – vaccinated macaque

11 A<sup>b</sup> – control macaque with adjuvant only

12

13 **Table S2C related to Fig. 2B.**

14 **The sera IT50s of vaccinated and control macaques.**

| Time-point | IT50, <i>H. pylori</i> 17875/Leb and I9 |    |           |     |           |    |                 |    |           |    |
|------------|-----------------------------------------|----|-----------|-----|-----------|----|-----------------|----|-----------|----|
|            | V2 <sup>a</sup>                         |    | V3        |     | V4        |    | A1 <sup>b</sup> |    | A4        |    |
|            | 17875/Leb                               | I9 | 17875/Leb | I9  | 17875/Leb | I9 | 17875/Leb       | I9 | 17875/Leb | I9 |
| Pre-serum  | 4                                       | 18 | 1         | 38  | 1         | 7  | 1               | 30 | 1         | 17 |
| Week 2     | 8                                       | 63 | 30        | 102 | 17        | 58 | 1               | 30 | 1         | 25 |
| Week 4     | 25                                      | 79 | 28        | 131 | 18        | 52 | 1               | -  | 1         | -  |
| Week 8     | 46                                      | 89 | 17        | 171 | 12        | 56 | 1               | -  | 1         | -  |

15 V<sup>a</sup> – vaccinated macaque

16 A<sup>b</sup> – control macaque with adjuvant only

17

1 Table S3 related to Fig. 3 and 4.

2

3 Table S3A related to Fig 3B.

4 Sera IT50 for *H. pylori* 17875/Leb and Histological Scoring of *H. pylori* infected and vaccinated Leb-mice.

5 Group I, Infected Mice (34 mice).

| Mouse | CFU/g | Leb binding, % | Chronic Gastritis | Dysplasia | Cancer | Inflammation Score | Final Diagnosis | IT50 |
|-------|-------|----------------|-------------------|-----------|--------|--------------------|-----------------|------|
| #1-1  | 13333 | 0              | +                 | +         | +      | 2                  | Cancer          | 1    |
| #1-2  | 0     | -              | +                 | -         | -      | 1                  | GA              | 1    |
| #1-4  | 1600  | 10             | +                 | +         | -      | 1                  | DYSP            | 1    |
| #1-5  | 1278  | 0              | +                 | -         | -      | 2                  | GA              | 1    |
| #1-8  | 0     | -              | +                 | +         | +      | 3                  | Cancer          | 1    |
| #1-10 | 0     | -              | +                 | +         | +      | 3                  | Cancer          | 1    |
| #1-12 | 0     | -              | +                 | -         | -      | 2                  | GA              | 1    |
| #1-13 | 0     | -              | +                 | -         | -      | 1                  | GA              | 1    |
| #1-14 | 6321  | 0              | +                 | +         | +      | 3                  | Cancer          | 1    |
| #1-15 | 438   | 0              | +                 | +         | +      | 2                  | Cancer          | 1    |
| #1-16 | 0     | -              | +                 | -         | -      | 1                  | GA              | 1    |
| #1-18 | 469   | 0              | +                 | +         | +      | 3                  | Cancer          | 1    |
| #1-19 | 0     | -              | +                 | +         | +      | 2                  | Cancer          | 1    |
| #1-21 | 125   | 0              | +                 | +         | +      | 3                  | Cancer          | 1    |
| #1-24 | 0     | -              | +                 | +         | -      | 1                  | DYSP            | 1    |
| #1-25 | 3950  | 0              | +                 | +         | +      | 3                  | Cancer          | 1    |
| #1-27 | 0     | -              | +                 | -         | -      | 1                  | GA              | 1    |
| #1-28 | 39    | 0              | +                 | +         | +      | 3                  | Cancer          | 1    |
| #1-29 | 563   | 0              | +                 | +         | +      | 3                  | Cancer          | 1    |
| #1-30 | 0     | -              | +                 | -         | -      | 2                  | GA              | 1    |
| #1-31 | 145   | 0              | +                 | +         | +      | 3                  | Cancer          | 1    |
| #1-32 | 886   | 0              | +                 | +         | +      | 3                  | Cancer          | 1    |
| #1-33 | 283   | 0              | +                 | +         | +      | 3                  | Cancer          | 1    |
| #1-34 | 0     | -              | +                 | +         | +      | 3                  | Cancer          | 1    |
| #1-35 | 205   | 0              | +                 | +         | -      | 2                  | DYSP            | 2    |
| #1-17 | 2200  | 0              | +                 | -         | -      | 2                  | GA              | 3    |
| #1-6  | 0     | -              | +                 | +         | +      | 3                  | Cancer          | 3    |
| #1-7  | 0     | --             | +                 | -         | -      | 1                  | GA              | 4    |

|                         |      |   |   |   |   |                    |        |    |
|-------------------------|------|---|---|---|---|--------------------|--------|----|
| #1-20                   | 0    | - | + | + | + | 3                  | Cancer | 6  |
| #1-26                   | 0    | - | + | + | + | 3                  | Cancer | 7  |
| #1-3                    | 0    | - | + | + | - | 2                  | DYSP   | 7  |
| #1-23                   | 0    | - | + | + | - | 2                  | DYSP   | 7  |
| #1-22                   | 0    | - | + | + | - | 2                  | DYSP   | 7  |
| #1-9                    | 4556 | 0 | + | + | + | 3                  | Cancer | 10 |
| 16 CFU positive/34 mice |      |   |   |   |   | 77/34 animals=2.26 |        |    |
| Mean, 2274              |      |   |   |   |   |                    |        |    |
| Median, 725             |      |   |   |   |   |                    |        |    |

1  
2  
3  
4

**Table S3B related to Fig 3B.  
Group II, Infected Mice (30 mice).**

| Mouse | CFU/g | Leb binding, % | Chronic Gastritis | Dysplasia | Cancer | Inflammation Score | Final Diagnosis | IT50 |
|-------|-------|----------------|-------------------|-----------|--------|--------------------|-----------------|------|
| #1-1  | 4222  | 0              | +                 | -         | -      | 1                  | GA              | 1    |
| #1-2  | 0     | -              | +                 | -         | -      | 0                  | GA              | 1    |
| #1-3  | 0     | -              | +                 | -         | -      | 0                  | GA              | 1    |
| #1-5  | 0     | -              | +                 | +         | +      | 3                  | Cancer          | 1    |
| #1-7  | 1000  | 0              | +                 | +         | +      | 2                  | Cancer          | 1    |
| #1-8  | 0     | -              | +                 | +         | -      | 0                  | DYSP            | 1    |
| #1-9  | 200   | 3              | +                 | +         | -      | 1                  | DYSP            | 1    |
| #1-10 | 263   | 0              | +                 | +         | +      | 3                  | Cancer          | 1    |
| #1-11 | 8499  | 0              | +                 | +         | +      | 3                  | Cancer          | 1    |
| #1-12 | 10500 | 0              | +                 | +         | +      | 3                  | Cancer          | 1    |
| #1-13 | 0     | -              | +                 | -         | -      | 1                  | GA              | 1    |
| #1-14 | 0     | -              | +                 | -         | -      | 0                  | GA              | 1    |
| #1-15 | 0     | -              | +                 | -         | -      | 1                  | GA              | 1    |
| #1-16 | 0     | -              | +                 | +         | +      | 2                  | Cancer          | 1    |
| #1-19 | 0     | -              | +                 | +         | +      | 3                  | Cancer          | 1    |
| #1-20 | 0     | -              | +                 | +         | -      | 2                  | DYSP            | 1    |
| #1-21 | 80    | 0              | +                 | +         | -      | 1                  | DYSP            | 1    |
| #1-22 | 0     | -              | +                 | -         | -      | 1                  | GA              | 1    |
| #1-23 | 0     | -              | +                 | -         | -      | 1                  | GA              | 1    |
| #1-25 | 0     | -              | +                 | -         | -      | 0                  | GA              | 1    |

|       |                        |   |   |   |   |                   |        |    |
|-------|------------------------|---|---|---|---|-------------------|--------|----|
| #1-26 | 0                      | - | + | + | - | 0                 | DYSP   | 1  |
| #1-27 | 0                      | - | + | + | - | 1                 | DYSP   | 1  |
| #1-28 | 0                      | - | + | + | - | 1                 | DYSP   | 1  |
| #1-29 | 947                    | 0 | + | + | + | 2                 | Cancer | 1  |
| #1-31 | 0                      | - | + | + | + | 1                 | Cancer | 1  |
| #1-6  | 0                      | - | + | + | + | 1                 | Cancer | 6  |
| #1-17 | 0                      | - | + | + | - | 2                 | DYSP   | 6  |
| #1-4  | 57629                  | 0 | + | + | + | 3                 | Cancer | 9  |
| #1-18 | 0                      | - | + | - | - | 1                 | GA     | 9  |
| #1-30 | 0                      | - | + | + | + | 2                 | Cancer | 14 |
|       | 9 CFU positive/30 mice |   |   |   |   | 42/30 animals=1.4 |        |    |
|       | <b>Mean, 9260</b>      |   |   |   |   |                   |        |    |
|       | <b>Median, 1000</b>    |   |   |   |   |                   |        |    |

1  
2  
3  
4

**Table S3C related to Fig 3B.  
Group III, Non- infected Mice (12 mice).**

| Mouse | CFU/g            | Leb binding, % | Chronic Gastritis | Dysplasia | Cancer | Inflammation Score    | Final Diagnosis | IT50 |
|-------|------------------|----------------|-------------------|-----------|--------|-----------------------|-----------------|------|
| #2-1  | 0                | -              | -                 | -         | -      | 0                     |                 | 1    |
| #2-2  | 0                | -              | -                 | -         | -      | 0                     |                 | 1    |
| #2-3  | 0                | -              | -                 | -         | -      | 0                     |                 | 1    |
| #2-5  | 0                | -              | -                 | -         | -      | 0                     |                 | 1    |
| #2-6  | 0                | -              | -                 | -         | -      | 0                     |                 | 1    |
| #2-7  | 0                | -              | -                 | -         | -      | 0                     |                 | 1    |
| #2-9  | 0                | -              | -                 | -         | -      | 0                     |                 | 1    |
| #2-10 | 0                | -              | -                 | -         | -      | 0                     |                 | 1    |
| #2-11 | 0                | -              | -                 | -         | -      | 0                     |                 | 1    |
| #2-12 | 0                | -              | -                 | -         | -      | 0                     |                 | 1    |
| #2-13 | 0                | -              | -                 | -         | -      | 0                     |                 | 1    |
| #2-14 | 0                | -              | -                 | -         | -      | 0                     |                 | 1    |
|       | <b>Mean, 0</b>   |                |                   |           |        | <b>0/12 animals=0</b> |                 |      |
|       | <b>Median, 0</b> |                |                   |           |        |                       |                 |      |

5  
6

1 **Table S3D related to Fig. 3C.**  
 2 **Histological Scoring of long-term (2-12 months) *H. pylori* infected Leb-mice.**

| Group                             | Mouse ID           | CFU/g             | Leb binding, % | Gastritis | Dysplasia | Cancer | Final Diagnosis | Inflammation Score |
|-----------------------------------|--------------------|-------------------|----------------|-----------|-----------|--------|-----------------|--------------------|
| 2 month post-infection<br>10 mice | B140               | 300               | 11             | +         | -         | -      | GA              | 1                  |
|                                   | B141               | 0                 | -              | +         | -         | -      | GA              | 1                  |
|                                   | B165               | 250               | 12             | +         | -         | -      | GA              | 1                  |
|                                   | B172               | 1833              | 10             | +         | +         | -      | DYSP            | 2                  |
|                                   | B177               | 750               | 18             | +         | -         | -      | GA              | 1                  |
|                                   | B178               | 375               | 19             | +         | -         | -      | GA              | 1                  |
|                                   | B212               | 6833              | 0              | +         | -         | -      | GA              | 2                  |
|                                   | B213               | 1750              | 9              | +         | -         | -      | GA              | 2                  |
|                                   | B216               | 4917              | 8              | +         | -         | -      | GA              | 1                  |
|                                   | B217               | 37000             | 0              | +         | -         | -      | GA              | 1                  |
|                                   |                    | <b>Mean, 6001</b> |                |           |           |        |                 |                    |
|                                   | <b>Median,1750</b> |                   |                |           |           |        |                 |                    |
| 6 month post-infection<br>29 mice | B80                | 0                 | 0              | +         | -         | -      | GA              | 1                  |
|                                   | B82                | 167               | 9              | +         | -         | -      | GA              | 1                  |
|                                   | B84                | 0                 | -              | +         | +         | -      | DYSP            | 2                  |
|                                   | B86                | 3750              | 5              | +         | -         | -      | GA              | 1                  |
|                                   | B87                | 1000              | 11             | +         | +         | -      | DYSP            | 2                  |
|                                   | B88                | 250               | 11             | +         | -         | -      | GA              | 1                  |
|                                   | B92                | 188               | 0              | +         | -         | -      | GA              | 2                  |
|                                   | B105               | 50                | 16             | +         | -         | -      | GA              | 1                  |
|                                   | B106               | 3917              | 0              | +         | +         | -      | DYSP            | 2                  |
|                                   | B111               | 10400             | 14             | +         | +         | -      | DYSP            | 2                  |
|                                   | AB112              | 0                 | -              | +         | -         | -      | GA              | 1                  |
|                                   | AB113              | 464               | 5              | +         | +         | -      | DYSP            | 2                  |
|                                   | AB115              | 800               | 11             | +         | -         | -      | GA              | 2                  |
|                                   | AB116              | 500               | 9              | +         | -         | -      | GA              | 1                  |
|                                   | AB117              | 125               | 0              | +         | -         | -      | GA              | 1                  |
|                                   | AB119              | 50                | 11             | +         | -         | -      | GA              | 1                  |
|                                   | AB120              | 542               | 8              | +         | -         | -      | GA              | 2                  |
| AB121                             | 0                  | -                 | +              | +         | -         | DYSP   | 2               |                    |
| B144                              | 36                 | 11                | +              | +         | -         | DYSP   | 1               |                    |

|                                          |      |                    |    |   |   |        |        |   |
|------------------------------------------|------|--------------------|----|---|---|--------|--------|---|
|                                          | B145 | 333                | 10 | + | + | -      | DYSP   | 1 |
|                                          | B146 | 1125               | -  | + | - | -      | GA     | 1 |
|                                          | B154 | 281                | 10 | + | - | -      | GA     | 1 |
|                                          | B159 | 156                | 13 | + | + | -      | DYSP   | 2 |
|                                          | B161 | 225                | 12 | + | + | -      | DYSP   | 2 |
|                                          | B162 | 313                | 12 | + | + | -      | DYSP   | 1 |
|                                          | B167 | 1500               | 9  | + | - | -      | GA     | 1 |
|                                          | B169 | 464                | 8  | + | + | -      | DYSP   | 1 |
|                                          | B196 | 0                  | -  | + | - | -      | GA     | 2 |
|                                          | B197 | 1075               | 8  | + | - | -      | GA     | 2 |
|                                          |      | <b>Mean, 1112</b>  |    |   |   |        |        |   |
|                                          |      | <b>Median, 333</b> |    |   |   |        |        |   |
| <b>9 month post-infection</b><br>34 mice | B83  | 125                | 8  | + | - | -      | GA     | 1 |
|                                          | B85  | 0                  | -  | + | - | -      | GA     | 1 |
|                                          | B89  | 0                  | -  | + | - | -      | GA     | 1 |
|                                          | B116 | 0                  | -  | + | - | -      | GA     | 1 |
|                                          | B119 | 0                  | -  | + | + | -      | DYSP   | 2 |
|                                          | B120 | 0                  | -  | + | + | -      | DYSP   | 2 |
|                                          | B121 | 0                  | -  | + | - | -      | GA     | 2 |
|                                          | B122 | 143                | 4  | + | + | -      | DYSP   | 1 |
|                                          | B123 | 781                | 5  | + | + | -      | DYSP   | 1 |
|                                          | B125 | 0                  | -  | + | - | -      | GA     | 1 |
|                                          | B126 | 156                | 6  | + | + | -      | DYSP   | 1 |
|                                          | B138 | 0                  | -  | + | - | -      | GA     | 1 |
|                                          | B139 | 0                  | -  | + | - | -      | GA     | 1 |
|                                          | B148 | 143                | 5  | + | - | -      | GA     | 1 |
|                                          | B150 | 150                | 6  | + | - | -      | GA     | 1 |
|                                          | B157 | 0                  | -  | + | - | -      | GA     | 1 |
|                                          | B160 | 0                  | -  | + | - | -      | GA     | 1 |
|                                          | B163 | 222                | 8  | + | - | -      | GA     | 2 |
|                                          | B168 | 50                 | 9  | + | + | -      | DYSP   | 1 |
|                                          | B170 | 0                  | -  | + | + | +      | Cancer | 2 |
| B171                                     | 500  | 5                  | +  | + | + | Cancer | 2      |   |
| B180                                     | 107  | 4                  | +  | - | - | GA     | 1      |   |
| B183                                     | 2500 | 0                  | +  | + | - | DYSP   | 1      |   |

|                                                         |       |                    |                    |   |   |   |        |   |    |    |
|---------------------------------------------------------|-------|--------------------|--------------------|---|---|---|--------|---|----|----|
|                                                         | B184  | 0                  | -                  | + | + | - | DYSP   | 1 | 1  |    |
|                                                         | B185  | 313                | 4                  | + | + | + | Cancer | 2 | 2  |    |
|                                                         | B186  | 156                | 4                  | + | + | - | DYSP   | 2 | 3  |    |
|                                                         | B187  | 281                | 3                  | + | + | - | DYSP   | 1 | 4  |    |
|                                                         | B188  | 417                | 11                 | + | + | - | DYSP   | 2 | 5  |    |
|                                                         | B189  | 1750               | 0                  | + | - | - | DYSP   | 1 | 6  |    |
|                                                         | B190  | 2568               | 0                  | + | - | - | GA     | 1 | 7  |    |
|                                                         | B191  | 28                 | 0                  | + | + | - | GA     | 1 | 8  |    |
|                                                         | B192  | 333                | 8                  | + | + | - | DYSP   | 1 | 9  |    |
|                                                         | B193  | 0                  | -                  | + | + | - | GA     | 2 | 10 |    |
|                                                         | AB110 | 292                | 3                  | + | - | - | GA     | 2 | 11 |    |
|                                                         |       | <b>Mean, 551</b>   |                    |   |   |   |        |   | 12 |    |
|                                                         |       | <b>Median, 251</b> |                    |   |   |   |        |   | 13 |    |
| <b>12<br/>month<br/>post-<br/>infection<br/>10 mice</b> | B133  | 0                  | -                  | + | - | - | GA     | 1 | 14 |    |
|                                                         | B134  | 0                  | -                  | + | - | - | GA     | 1 | 15 |    |
|                                                         | B135  | 167                | 19                 | + | + | - | DYSP   | 1 | 16 |    |
|                                                         | B136  | 0                  | -                  | + | - | - | GA     | 1 | 17 |    |
|                                                         | B151  | 250                | 17                 | + | + | + | Cancer | 2 | 18 |    |
|                                                         | B152  | 0                  | -                  | + | + | - | DYSP   | 2 | 19 |    |
|                                                         | B203  | 500                | 7                  | + | + | + | Cancer | 2 | 20 |    |
|                                                         | B204  | 726                | 10                 | + | + | - | DYSP   | 1 | 21 |    |
|                                                         | B205  | 0                  | -                  | + | + | - | DYSP   | 1 | 22 |    |
|                                                         | B206  | 0                  | -                  | + | + | + | Cancer | 1 | 23 |    |
|                                                         |       |                    | <b>Mean, 410</b>   |   |   |   |        |   |    | 24 |
|                                                         |       |                    | <b>Median, 375</b> |   |   |   |        |   |    |    |

25

26



1 **Table S3E related to Fig. 3D.**  
 2 **Sera IT50 for *H. pylori* 17875/Leb and Histological Scoring of *H. pylori* infected Leb-mice after eradiction of**  
 3 **infection by antibiotics.**

| Group                                   | Mouse ID | Dysplasia | Cancer | Final Diagnosis |
|-----------------------------------------|----------|-----------|--------|-----------------|
| <b>Non-infected (9 mice)</b>            | B740     | -         | -      |                 |
|                                         | B741     | -         | -      |                 |
|                                         | B742     | -         | -      |                 |
|                                         | B743     | -         | -      |                 |
|                                         | B745     | -         | -      |                 |
|                                         | B746     | -         | -      |                 |
|                                         | B747     | -         | -      |                 |
|                                         | B748     | -         | -      |                 |
|                                         | B749     | -         | -      |                 |
| <b>12 week post-infection (7 mice)</b>  | B758     | -         | -      |                 |
|                                         | B759     | -         | -      |                 |
|                                         | B767     | -         | -      |                 |
|                                         | B773     | -         | -      |                 |
|                                         | B774     | -         | -      |                 |
|                                         | B776     | +         | -      | DYSP            |
|                                         | B788     | -         | -      |                 |
| <b>22 week post-infection (10 mice)</b> | B777     | +         | +      | Cancer          |
|                                         | B778     | +         | -      | DYSP            |
|                                         | B779     | -         | -      | Cancer          |
|                                         | B780     | -         | -      | Cancer          |
|                                         | B782     | +         | -      | DYSP            |
|                                         | B783     | +         | -      | DYSP            |
|                                         | B784     | +         | +      | Cancer          |
|                                         | B785     | +         | +      | Cancer          |
|                                         | B786     | +         | -      | DYSP            |
|                                         | B787     | -         | -      | -               |
| <b>48 week post-infection (10 mice)</b> | B800     | -         | -      |                 |
|                                         | B801     | +         | +      | Cancer          |
|                                         | B802     | +         | +      | Cancer          |
|                                         | B803     | -         | -      |                 |

|  |      |   |   |        |   |
|--|------|---|---|--------|---|
|  | B804 | + | - | DYSP   | 1 |
|  | B805 | + | + | Cancer | 2 |
|  | B807 | - | - |        | 3 |
|  | B808 | + | + | Cancer | 4 |
|  | B809 | + | - | DYSP   | 5 |
|  | B810 | + | - | DYSP   | 6 |

7  
8  
9  
10

**Table S3F related to Figure 3E and 3F.**

**Prevalence of CFU-positive *H. pylori* Leb-mice and their Leb-binding activity at the 12 months end-point.**

| <b>Group</b>                        | <b>Treatment</b>                   | <b>CFU-positive mice, %</b> | <b>Leb-binders among outputs, %</b> |
|-------------------------------------|------------------------------------|-----------------------------|-------------------------------------|
| Group I, Fig. 3B                    | <i>H. pylori</i> infected Leb mice | 47                          | 6                                   |
| Group II, Fig. 3B                   | <i>H. pylori</i> infected Leb mice | 30                          | 11                                  |
| Group Infected/Controls, Fig. 5 ABC | <i>H. pylori</i> infected Leb mice | 38                          | 16                                  |
| Group Infected/Controls, Fig.5 D    | <i>H. pylori</i> infected Leb mice | 20                          | 66                                  |
| Group 12m, Fig. 3C                  | <i>H. pylori</i> infected Leb mice | 40                          | 40                                  |
|                                     | <b>Median</b>                      | <b>38</b>                   | <b>16</b>                           |
|                                     | <b>Mean</b>                        | <b>35</b>                   | <b>28</b>                           |

11  
12

## 1 Table S4

2

## 3 Table S4A. related to Fig. 4B.

## 4 Group II, Infected and Vaccinated LOW and HIGH IT50 Mice (30 mice).

| Mouse                     | CFU/g | Leb binding, % | Chronic Gastritis | Dysplasia | Cancer | Inflammation Score | Final Diagnosis | IT50       |
|---------------------------|-------|----------------|-------------------|-----------|--------|--------------------|-----------------|------------|
| <b>Low IT50 (23 mice)</b> |       |                |                   |           |        |                    |                 |            |
| #4-1                      | 0     | -              | +                 | +         | -      | 0                  | DYSP            | 1          |
| #4-2                      | 1571  | 0              | +                 | +         | +      | 3                  | Cancer          | 1          |
| #4-3                      | 0     | -              | +                 | +         | +      | 3                  | Cancer          | 1          |
| #4-6                      | 0     | -              | +                 | +         | -      | 1                  | DYSP            | 1          |
| #4-7                      | 0     | -              | +                 | +         | -      | 1                  | DYSP            | 1          |
| #4-10                     | 0     | -              | +                 | -         | -      | 0                  | GA              | 1          |
| #4-20                     | 441   | 5              | +                 | +         | -      | 2                  | DYSP            | 1          |
| #4-23                     | 0     | -              | +                 | -         | -      | 1                  | GA              | 1          |
| #4-28                     | 200   | 0              | +                 | +         | -      | 0                  | DYSP            | 1          |
| #4-11                     | 0     | -              | +                 | -         | -      | 1                  | GA              | 9          |
| #4-29                     | 800   | 0              | +                 | +         | +      | 2                  | Cancer          | 16         |
| #4-21                     | 1312  | 0              | +                 | +         | +      | 3                  | Cancer          | 27         |
| #4-26                     | 0     | -              | +                 | +         | +      | 2                  | Cancer          | 27         |
| #4-15                     | 100   | 10             | +                 | +         | +      | 2                  | Cancer          | 29         |
| #4-17                     | 0     | -              | +                 | +         | +      | 2                  | Cancer          | 59         |
| #4-8                      | 0     | -              | +                 | +         | +      | 1                  | Cancer          | 62         |
| #4-30                     | 400   | 9              | +                 | +         | +      | 1                  | Cancer          | 74         |
| #4-19                     | 3583  | 0              | +                 | +         | +      | 2                  | Cancer          | 81         |
| #4-13                     | 0     | -              | +                 | +         | +      | 3                  | Cancer          | 96         |
| #4-14                     | 0     | -              | +                 | +         | +      | 3                  | Cancer          | 181        |
| #4-24                     | 0     | -              | +                 | +         | +      | 1                  | Cancer          | 281        |
| #4-5                      | 4317  | 0              | +                 | +         | +      | 3                  | Cancer          | 216        |
| #4-4                      | 0     | -              | +                 | +         | +      | 2                  | Cancer          | 542        |
|                           |       |                |                   |           |        | 39/23 animals=1.7  |                 | Median, 27 |
| <b>High IT50 (7 mice)</b> |       |                |                   |           |        |                    |                 |            |
| #4-22                     | 0     | -              | +                 | -         | -      | 0                  | GA              | 912        |
| #4-27                     | 1500  | 0              | +                 | +         | +      | 2                  | Cancer          | 1347       |

|       |      |   |   |   |   |                   |        |              |
|-------|------|---|---|---|---|-------------------|--------|--------------|
| #4-16 | 0    | - | + | - | - | 1                 | GA     | 1427         |
| #4-25 | 0    | - | + | - | - | 0                 | GA     | 1813         |
| #4-12 | 1466 | 0 | + | + | - | 2                 | DYSP   | 4287         |
| #4-9  | 0    | - | + | + | + | 2                 | Cancer | 6569         |
| #4-18 | 0    | - | + | - | - | 0                 | GA     | 24028        |
|       |      |   |   |   |   | 46/30 animals=1.5 |        | Median, 1813 |

1  
2  
3  
4  
5  
6  
7  
8  
9  
10  
11  
12

**Table S4B related to Fig. 4C.**  
**The 1st Vaccine Experiment. Summary of incidence of disease**

| Titer                      | GAstritis | DYSPlasia | Cancer | <u>Cancer</u><br>GAstritis |
|----------------------------|-----------|-----------|--------|----------------------------|
| Low IT50 (L)               | 3         | 5         | 15     | 3                          |
| High IT50 (H)              | 4         | 1         | 2      | 0.5                        |
| Ratio Low IT50 / High IT50 |           |           |        | 6                          |
| Fisher's Test              |           |           |        | 0.038                      |

The panel shows the number of animals in the group of “Infected and vaccinated” with a 3.0 vs. 0.5 ratio of Cancer/Gastritis for the Low (23 animals) vs. High (7 animals) IT50 groups, respectively. The difference in ratios demonstrated a 6-fold reduced risk for gastric cancer in the High IT50 group ( $p < 0.038$ ).

**Table S4C related to Fig. 3 and Fig. 4.**  
**The Cancer model Summary of disease and inflammation scores.**

| Group                       | Disease/<br>Score | 0 | 1 | 2 | 3  | Total<br>Score | No.<br>Mice | Mean Infl.<br>Scores/<br>Disease | Mean Infl.<br>Scores/<br>Group | No.<br>mice/<br>Group | Disease   |
|-----------------------------|-------------------|---|---|---|----|----------------|-------------|----------------------------------|--------------------------------|-----------------------|-----------|
| Exp. 1, Grp. 1,<br>Infected | Gastritis         |   | 5 | 4 |    | 13             | 9           | 1.4                              |                                |                       | 9/34=26%  |
|                             | Dysplasia         |   | 2 | 4 |    | 10             | 6           | 1.7                              |                                |                       | 6/34=18%  |
|                             | Cancer            |   |   | 3 | 16 | 54             | 19          | 2.8                              | 2.25 (Fig. 3B)                 | 34                    | 19/34=56% |
| Exp. 2, Grp. 2,<br>Infected | Gastritis         | 4 | 6 |   |    | 6              | 10          | 0.6                              |                                |                       | 10/30=33% |
|                             | Dysplasia         | 2 | 4 | 2 |    | 8              | 8           | 1.0                              |                                |                       | 8/30=27%  |
|                             | Cancer            |   | 2 | 4 | 6  | 28             | 12          | 2.3                              | 1.4 (Fig. 3B, 4A)              | 30                    | 12/30=40% |
| Exp. 2, Grp. 2,             | Gastritis         | 1 | 2 |   |    | 2              | 3           | 0.7                              |                                |                       | 3/23=13%  |

|                                                    |           |   |   |   |   |    |           |             |               |           |                     |
|----------------------------------------------------|-----------|---|---|---|---|----|-----------|-------------|---------------|-----------|---------------------|
| Infected, Vaccine,<br>Low IT50                     | Dysplasia | 2 | 2 | 1 |   | 4  | 5         | 0.8         |               |           | 5/23=22%            |
|                                                    | Cancer    |   | 3 | 6 | 6 | 33 | 15        | 2.2         | 1.7           | 23        | 15/23=65%           |
| Exp. 2, Grp. 2,<br>Infected, Vaccine,<br>High IT50 | Gastritis | 3 | 1 |   |   | 1  | 4         | <b>0.25</b> |               |           | 4/7=57%             |
|                                                    | Dysplasia |   |   | 1 |   | 2  | 1         | 2.0         |               |           | 1/7=14%             |
|                                                    | Cancer    |   |   | 2 |   | 4  | 2         | 2.0         | 1.0 (Fig. 4C) | 7         | 2/7=28%             |
|                                                    |           |   |   |   |   |    | <b>94</b> |             |               | <b>94</b> | <b>In Figure 4C</b> |

1

| Summary<br>Inflammation<br>score / disease | Disease   | Total Scores | No. Mice   | Scores/cases | Mean Scores |
|--------------------------------------------|-----------|--------------|------------|--------------|-------------|
|                                            | Gastritis | 13+6+2+1     | 9+10+4+4   | 22 / 27      | 0.8         |
|                                            | Dysplasia | 10+8+4+2     | 6+8+5+1    | 24 / 20      | 1.2         |
|                                            | Cancer    | 54+28+33+4   | 19+12+15+2 | 119 / 48     | 2.5         |

2

3

1 Table S4D related to Fig. 5.

2

3 The 2<sup>nd</sup> Vaccine Experiment related to Fig. 5ABC.

| Mouse                                         | CFU/g | Leb binding, % | Gastric pH  | Chronic Gastritis | Dysplasia | Cancer | Inflammation Score | Final Diagnosis | IT50, 17875/Leb |
|-----------------------------------------------|-------|----------------|-------------|-------------------|-----------|--------|--------------------|-----------------|-----------------|
| <b>Infected mice (16 mice)</b>                |       |                |             |                   |           |        |                    |                 |                 |
| B891                                          |       |                | 1.5         | +                 | -         | -      | 1                  | GA              | 20              |
| B892                                          |       |                | 2.37        | +                 | +         | -      | 2                  | DYSP            | 16              |
| B893                                          | 7700  | 3              | 1.77        | +                 | +         | +      | 3                  | Cancer          | 22              |
| B894                                          | 56    | X              | 2.8         | +                 | +         | +      | 2                  | Cancer          | 10              |
| B895                                          |       |                | 1.54        | +                 | +         | -      | 2                  | DYSP            | 6               |
| B896                                          |       |                | 4.44        | +                 | -         | -      | 1                  | GA              | 24              |
| B897                                          | 750   | 0              | 3.19        | +                 | +         | -      | 1                  | DYSP            | 24              |
| B898                                          |       |                | 1.92        | -                 | -         | -      | 0                  | Healthy         | 20              |
| B912                                          |       |                | 3.04        | +                 | +         | +      | 1                  | Cancer          | 17              |
| B922                                          |       |                | 1.82        | +                 | +         | +      | 2                  | Cancer          | 10              |
| B935                                          | 813   | X              | 1.27        | +                 | -         | -      | 2                  | GA              | 22              |
| B936                                          | 929   | 0              | 3.26        | +                 | +         | +      | 3                  | Cancer          | 24              |
| B937                                          |       |                | 1.52        | +                 | -         | -      | 1                  | GA              | 13              |
| B938                                          |       |                | 1.35        | +                 | -         | -      | 1                  | GA              | 30              |
| B940                                          |       |                | 1.33        | +                 | -         | -      | 1                  | GA              | 8               |
| B942                                          | 167   | X              | 1.34        | +                 | -         | -      | 1                  | GA              | 21              |
|                                               |       |                |             |                   |           |        | Mean, 1.5          |                 | Median, 20      |
| <b>Infected and Vaccinated mice (21 mice)</b> |       |                |             |                   |           |        |                    |                 |                 |
| B899                                          |       |                | 2.4         | +                 | -         | -      | 1                  | GA              | 7667            |
| B900                                          |       |                | 4.96        | +                 | -         | -      | 1                  | GA              | 8539            |
| B901                                          |       |                | <b>3.53</b> | -                 | -         | -      | 0                  | Healthy         | 8698            |
| B903                                          |       |                | 1.82        | +                 | -         | -      | 1                  | DYSP            | 33622           |
| B904                                          | 150   | 16             | 3.83        | +                 | -         | -      | 1                  | GA              | 3959            |
| B905                                          |       |                | 1.77        | +                 | -         | -      | 1                  | GA              | 4146            |
| B906                                          | 2107  | 3              | 1.66        | +                 | -         | -      | 1                  | GA              | 3969            |
| B907                                          | 143   | 0              | 1.47        | +                 | -         | -      | 2                  | GA              | 6163            |
| B908                                          | 458   | 7              | 1.79        | +                 | -         | -      | 1                  | GA              | 2270            |
| B909                                          |       |                | 1.7         | +                 | -         | -      | 1                  | GA              | 7318            |
| B910                                          |       |                | 2.18        | +                 | -         | -      | 1                  | GA              | 764             |

|      |     |   |      |   |   |   |                   |         |              |
|------|-----|---|------|---|---|---|-------------------|---------|--------------|
| B917 | 286 | 1 | 1.86 | + | - | - | 0                 | Healthy | 12035        |
| B918 |     |   | 1.64 | + | - | - | 1                 | GA      | 11284        |
| B924 |     |   | 2.48 | + | + | - | 1                 | DYSP    | 5798         |
| B927 |     |   | 1.33 | + | - | - | 1                 | GA      | 5663         |
| B929 |     |   | 1.49 | + | + | - | 2                 | DYSP    | 10934        |
| B930 |     |   | 1.68 | + | - | - | 2                 | GA      | 13338        |
| B931 | 333 | X | 1.87 | + | - | - | 1                 | GA      | 33113        |
| B932 |     |   | 1.43 | + | + | - | 1                 | DYSP    | 40035        |
| B933 | 50  | X | 1.45 | + | - | - | 1                 | GA      | 12999        |
| B934 | 83  | X | 1.34 | + | - | - | 1                 | GA      | 5893         |
|      |     |   |      |   |   |   | Mean, <b>1.05</b> |         | Median, 7667 |

1 X – slow growing outputs

2

1 **Table S4E**

2

3 **The 3<sup>rd</sup> Vaccine Experiment related to Fig. 5D.**

4 **Infected (30 mice) and Vaccinated w High antigen dose (27 mice) and,**

5 **Infected and Vaccinated with Low antigen dose (28 mice)**

6

| Mouse                                  | CFU/g | Leb binding, % | Gastric pH | Chronic Gastritis | Dysplasia | Cancer | Inflammation Score | Final Diagnosis |
|----------------------------------------|-------|----------------|------------|-------------------|-----------|--------|--------------------|-----------------|
| <b>Infected control mice (30 mice)</b> |       |                |            |                   |           |        |                    |                 |
| B988                                   |       |                | 2.19       | +                 | +         | +      | 2                  | Cancer          |
| B989                                   | 267   | 15             | 2.17       | +                 | +         | -      | 2                  | DYSP            |
| B990                                   |       |                | 2.54       | +                 | +         | +      | 3                  | Cancer          |
| B991                                   |       |                | 3.87       | +                 | -         | -      | 1                  | GA              |
| B992                                   | 154   | 0              | 1.62       | +                 | +         | -      | 1                  | DYSP            |
| B993                                   |       |                | 1.62       | +                 | -         | -      | 1                  | GA              |
| B994                                   |       |                | 1.82       | +                 | +         | -      | 1                  | DYSP            |
| B995                                   |       |                | 1.72       | +                 | -         | -      | 1                  | GA              |
| B1013                                  |       |                | 2.17       | +                 | -         | -      | 1                  | GA              |
| B1014                                  |       |                | 1.95       | +                 | -         | -      | 1                  | GA              |
| B1015                                  |       |                | 1.49       | +                 | +         | -      | 2                  | DYSP            |
| B1016                                  |       |                | 2.29       | +                 | -         | -      | 1                  | GA              |
| B1017                                  |       |                | 2.05       | +                 | +         | +      | 1                  | Cancer          |
| B1018                                  |       |                | 2.66       | +                 | -         | -      | 2                  | GA              |
| B1019                                  |       |                | 2.48       | +                 | +         | +      | 1                  | Cancer          |
| B1036                                  | 71    | 0              | 1.58       | +                 | +         | -      | 1                  | DYSP            |
| B1037                                  | 286   | 34             | 2.48       | +                 | +         | -      | 1                  | DYSP            |
| B1039                                  |       |                | 1.52       | +                 | +         | -      | 1                  | DYSP            |
| B1040                                  |       |                | 1.66       | +                 | +         | -      | 1                  | DYSP            |
| B1041                                  |       |                | 2.66       | +                 | +         | -      | 1                  | DYSP            |
| B1042                                  |       |                | 2.15       | +                 | +         | -      | 1                  | DYSP            |
| B1043                                  |       |                | 3.81       | +                 | +         | -      | 1                  | DYSP            |
| B1060                                  |       |                | 1.85       | +                 | +         | -      | 1                  | DYSP            |
| B1061                                  |       |                | 2.43       | +                 | +         | -      | 1                  | DYSP            |
| B1062                                  | 295   | 22             | 2.1        | +                 | +         | +      | 2                  | Cancer          |



|                            |      |    |      |   |   |   |   |      |
|----------------------------|------|----|------|---|---|---|---|------|
| B1063                      |      |    | 2.74 | + | - | - | 1 | GA   |
| B1064                      |      |    | 1.83 | + | + | - | 1 | DYSP |
| B1065                      |      |    | 2.29 | + | + | - | 2 | DYSP |
| B1066                      |      |    | 1.72 | + | - | - | 1 | GA   |
| B1067                      | 62   | 20 | 2.0  | + | + | - | 1 | DYSP |
| <b>Vaccine-1 (27 mice)</b> |      |    |      |   |   |   |   |      |
| B996                       | 28   | X  | 1.6  | + | - | - | 1 | GA   |
| B997                       |      |    | 1.5  | + | - | - | 1 | GA   |
| B999                       |      |    | 1.68 | + | - | - | 1 | GA   |
| B1000                      | 159  | 21 | 1.78 | + | + | - | 1 | DYSP |
| B1001                      | 100  | 20 | 1.4  | + | - | - | 2 | DYSP |
| B1002                      |      |    | 1.76 | + | - | - | 1 | GA   |
| B1003                      | 83   | X  | 1.71 | + | - | - | 1 | GA   |
| B1020                      | 188  | 23 | 2.14 | + | - | - | 1 | GA   |
| B1021                      | 125  | X  | 1.86 | + | - | - | 1 | GA   |
| B1022                      |      |    | 1.66 | + | - | - | 1 | GA   |
| B1023                      |      |    | 1.57 | + | - | - | 1 | GA   |
| B1024                      |      |    | 1.64 | + | - | - | 1 | GA   |
| B1025                      | 42   | X  | 2.03 | + | - | - | 2 | GA   |
| B1026                      | 3050 | 31 | 2.58 | + | - | - | 1 | GA   |
| B1044                      |      |    | 1.73 | + | - | - | 1 | GA   |
| B1045                      |      |    | 1.28 | + | - | - | 1 | GA   |
| B1048                      | 105  | 21 | 2.39 | + | + | - | 1 | DYSP |
| B1049                      |      |    | 1.91 | + | - | - | 1 | GA   |
| B1050                      | 175  | X  | 3.55 | + | - | - | 1 | GA   |
| B1051                      |      |    | 2.07 | + | - | - | 1 | GA   |
| B1068                      | 2156 | 0  | 2.02 | + | - | - | 1 | GA   |
| B1070                      |      |    | 1.86 | + | + | - | 1 | DYSP |
| B1071                      | 167  | 0  | 3.95 | + | - | - | 1 | GA   |
| B1072                      |      |    | 1.71 | + | - | - | 1 | GA   |
| B1073                      | 31   | X  | 2.15 | + | + | - | 2 | DYSP |
| B1074                      |      |    | 1.79 | + | + | - | 1 | DYSP |
| B1075                      | 333  | 34 | 1.83 | + | - | - | 1 | GA   |
| <b>Vaccine-2 (28 mice)</b> |      |    |      |   |   |   |   |      |
| B1004                      |      |    | 1.13 | + | - | - | 1 | GA   |

|                                      |      |    |      |   |   |   |   |         |
|--------------------------------------|------|----|------|---|---|---|---|---------|
| B1005                                |      |    | 2.39 | + | - | - | 1 | GA      |
| B1006                                |      |    | 1.56 | + | - | - | 1 | GA      |
| B1009                                |      |    | 3.66 | + | - | - | 2 | GA      |
| B1010                                |      |    | 1.43 | + | + | - | 2 | DYSP    |
| B1011                                |      |    | 1.57 | + | + | - | 1 | DYSP    |
| B1028                                |      |    | 1.39 | + | - | - | 1 | GA      |
| B1029                                |      |    | 1.61 | + | - | - | 1 | GA      |
| B1030                                |      |    | 1.76 | + | - | - | 1 | GA      |
| B1031                                |      |    | 1.76 | + | - | - | 1 | GA      |
| B1032                                |      |    | 2.0  | + | - | - | 1 | GA      |
| B1033                                |      |    | 1.38 | + | - | - | 1 | GA      |
| B1034                                |      |    | 1.42 | + | - | - | 1 | GA      |
| B1052                                |      |    | 1.47 | + | - | - | 1 | GA      |
| B1054                                |      |    | 1.38 | + | - | - | 1 | GA      |
| B1055                                | 1000 | 5  | 1.99 | + | - | - | 2 | GA      |
| B1056                                |      |    | 1.83 | + | - | - | 1 | GA      |
| B1057                                |      |    | 2.01 | + | - | - | 1 | GA      |
| B1058                                | 375  | 19 | 1.63 | + | - | - | 1 | GA      |
| B1059                                |      |    | 1.71 | + | - | - | 1 | GA      |
| B1076                                | 94   | X  | 1.66 | + | - | - | 1 | GA      |
| B1077                                | 188  | 1  | 1.56 | + | - | - | 1 | GA      |
| B1078                                |      |    | 2.06 | + | - | - | 1 | GA      |
| B1079                                | 125  | 21 | 1.74 | + | - | - | 1 | GA      |
| B1080                                |      |    | 1.88 | + | - | - | 1 | GA      |
| B1081                                |      |    | 1.58 | + | - | - | 1 | GA      |
| B1082                                | 917  | 0  | 1.83 | + | - | - | 1 | GA      |
| B1083                                | 1096 | 0  | 2.0  | + | - | - | 1 | GA      |
| <b>Non-infected Control (4 mice)</b> |      |    |      |   |   |   |   |         |
| B1084                                |      |    | 1.38 | + | - | - |   | GA      |
| B1115                                |      |    | 1.49 | - | - | - |   | Healthy |
| B1116                                |      |    | 4.82 | - | - | - |   | Healthy |
| B1117                                |      |    | 1.46 | - | - | - |   | Healthy |

1 X – slow growing outputs

1 **Table S5.**

2

3 **Table S5A related to Fig. S5B.**

4 **IT50 of pooled sera of infected (control) and infected and vaccinated mice,**  
5 **from 3<sup>rd</sup> Vaccine Experiment. .**

6

| <b>Group</b>              | <b>Pool</b> | <b>Mouse Serum ID</b> | <b>IT50 of the Pool, tested with 17875/Leb</b> |
|---------------------------|-------------|-----------------------|------------------------------------------------|
| Infected/Control          | Ctrl        | B991                  | 12                                             |
|                           |             | B992                  |                                                |
|                           |             | B993                  |                                                |
|                           |             | B1016                 |                                                |
| Infected and Vaccinated-1 | V1-1        | B996                  | 11709                                          |
|                           |             | B997                  |                                                |
|                           |             | B999                  |                                                |
|                           |             | B1044                 |                                                |
|                           |             | B1045                 |                                                |
|                           | V1-2        | B1022                 | 5823                                           |
|                           |             | B1068                 |                                                |
|                           |             | B1070                 |                                                |
|                           |             | B1073                 |                                                |
|                           |             | B1074                 |                                                |
|                           | V1-3        | B1023                 | 7788                                           |
|                           |             | B1024                 |                                                |
|                           |             | B1025                 |                                                |
|                           |             | B1026                 |                                                |
|                           | V1-4        | B1048                 | 3882                                           |
|                           |             | B1071                 |                                                |
|                           |             | B1072                 |                                                |
|                           |             | B1075                 |                                                |
|                           | V1-5        | B1000                 | 6263                                           |
|                           |             | B1020                 |                                                |

|                           |       |       |              |
|---------------------------|-------|-------|--------------|
|                           |       | B1021 |              |
|                           |       | B1049 |              |
|                           | V1-6  | B1001 | 9941         |
|                           |       | B1002 |              |
|                           |       | B1003 |              |
|                           |       | B1050 |              |
|                           |       | B1051 |              |
|                           |       |       | Median, 7026 |
| Infected and Vaccinated-2 | V2-1  | B1004 | 2517         |
|                           |       | B1005 |              |
|                           |       | B1009 |              |
|                           |       | B1010 |              |
|                           |       | B1055 |              |
|                           | V2--2 | B1030 | 2828         |
|                           |       | B1054 |              |
|                           |       | B1059 |              |
|                           |       | B1076 |              |
|                           |       | B1079 |              |
|                           | V2-3  | B1028 | 7679         |
|                           |       | B1029 |              |
|                           |       | B1031 |              |
|                           |       | B1032 |              |
|                           | V2-4  | B1006 | 3645         |
|                           |       | B1011 |              |
|                           |       | B1033 |              |
|                           |       | B1034 |              |
|                           | V2-5  | B1052 | 3468         |
|                           |       | B1056 |              |
|                           |       | B1057 |              |
|                           |       | B1058 |              |
|                           | V2-6  | B1077 | 5207         |
| B1078                     |       |       |              |

|                      |     |       |              |
|----------------------|-----|-------|--------------|
|                      |     | B1080 |              |
|                      |     | B1081 |              |
|                      |     | B1082 |              |
|                      |     | B1083 |              |
|                      |     |       | Median, 3557 |
| Non-Infected Control | NIC | B1084 | 15           |
|                      |     | B1117 |              |
|                      |     | B1115 |              |
|                      |     | B1116 |              |

1

2

**Table S5B, related to Figure 6B.**

3

**The IT50 of pooled sera from the 2<sup>nd</sup> Vaccine Experiment of Infected Control mice and Vaccinated mice.**

| Origin               | Strain    | IT50 of Sera pool |                 |
|----------------------|-----------|-------------------|-----------------|
|                      |           | Control mice      | Vaccinated mice |
| Europe               | 17875/Leb | 1                 | 11732           |
|                      | J166      | 1                 | 353             |
|                      | Sw44      | 22                | 165             |
|                      | Sw103     | 1                 | 117             |
|                      | S864      | 56                | 160             |
|                      | USU101    | 43                | 271             |
| Asia                 | I9        | 81                | 235             |
|                      | Ch1       | 1                 | 345             |
|                      | J533      | 26                | 602             |
| North America/Alaska | A714      | 1                 | 90              |
|                      | A723      | 13                | 120             |
| South America        | P330      | 34                | 145             |
|                      | P436      | 19                | 113             |

4

5
